# Supplementary figures and images for: Circulating microRNA Signature Associated to Interstitial Lung Abnormalities in Respiratory Asymptomatic Subjects
Source: MDPI journal article supplement (doi:10.3390/cells9061556), 2020-06-26

# miR-16-5p

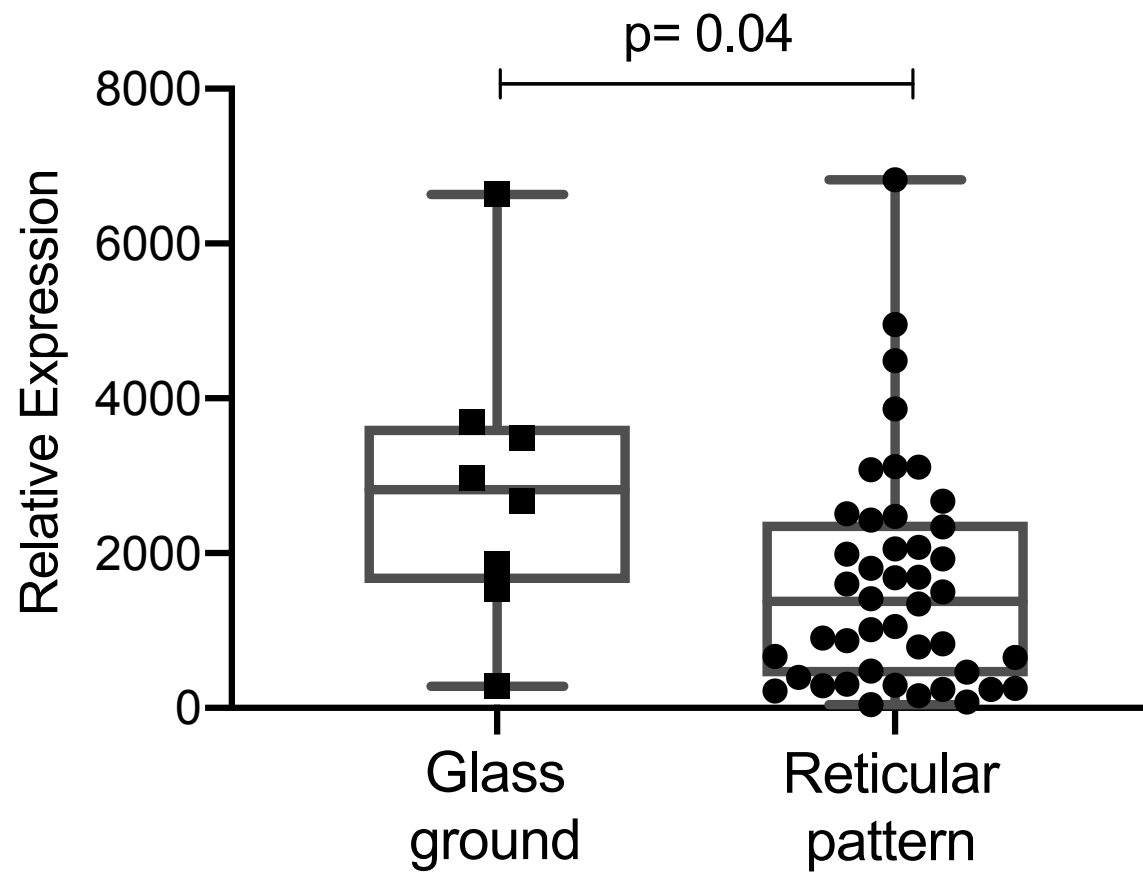

Supplement: s1 [file s1]

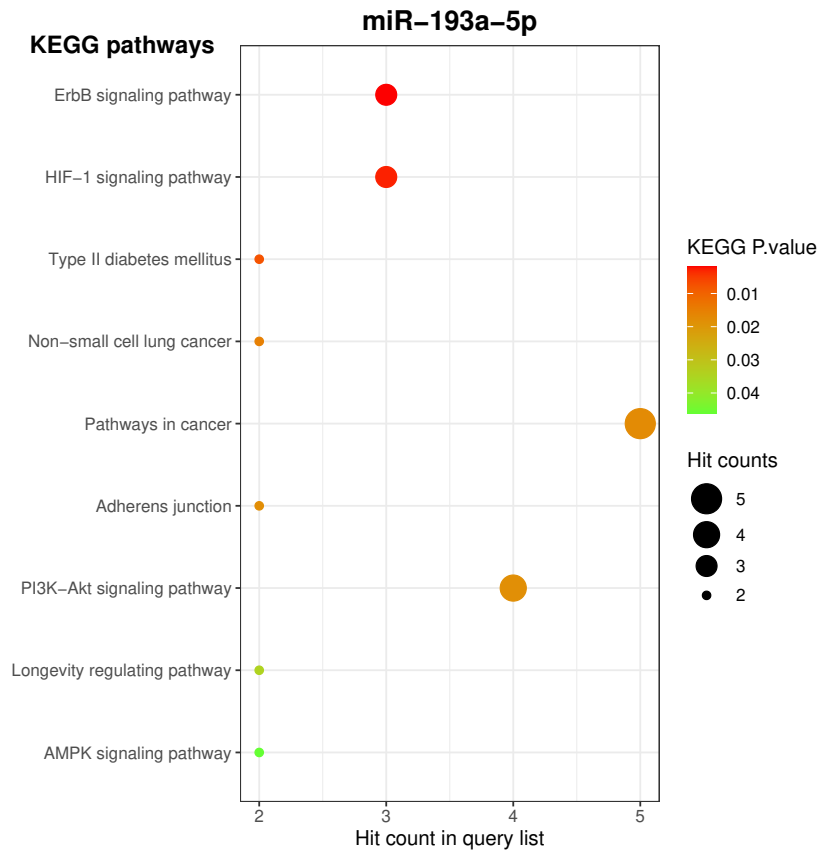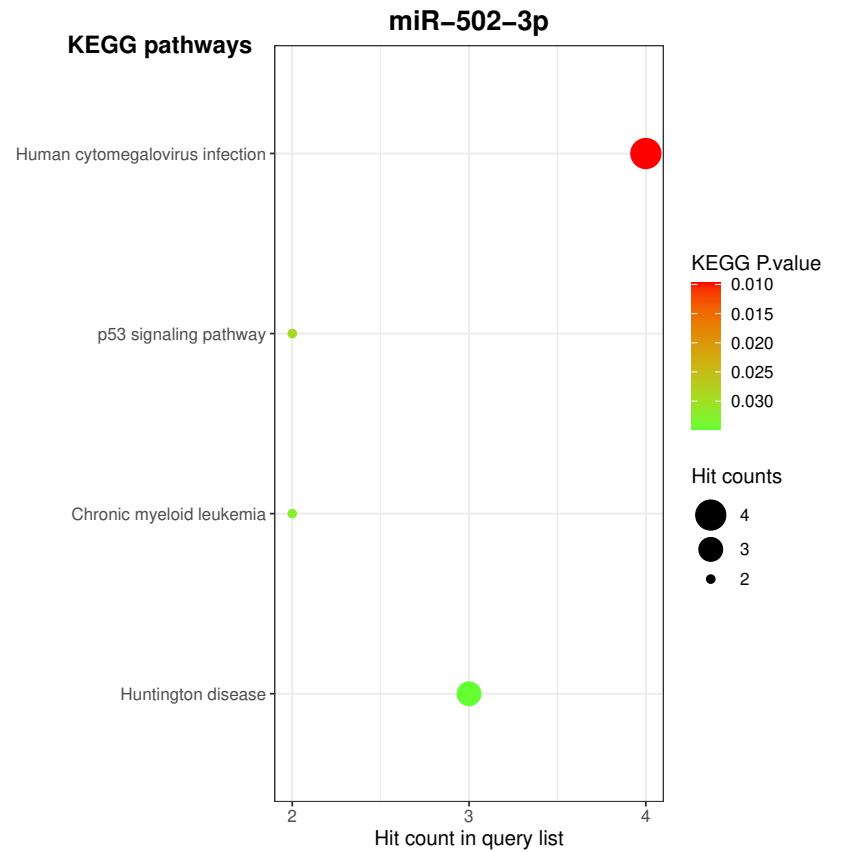

Supplement: s1 [file s1]

# Study Workflow

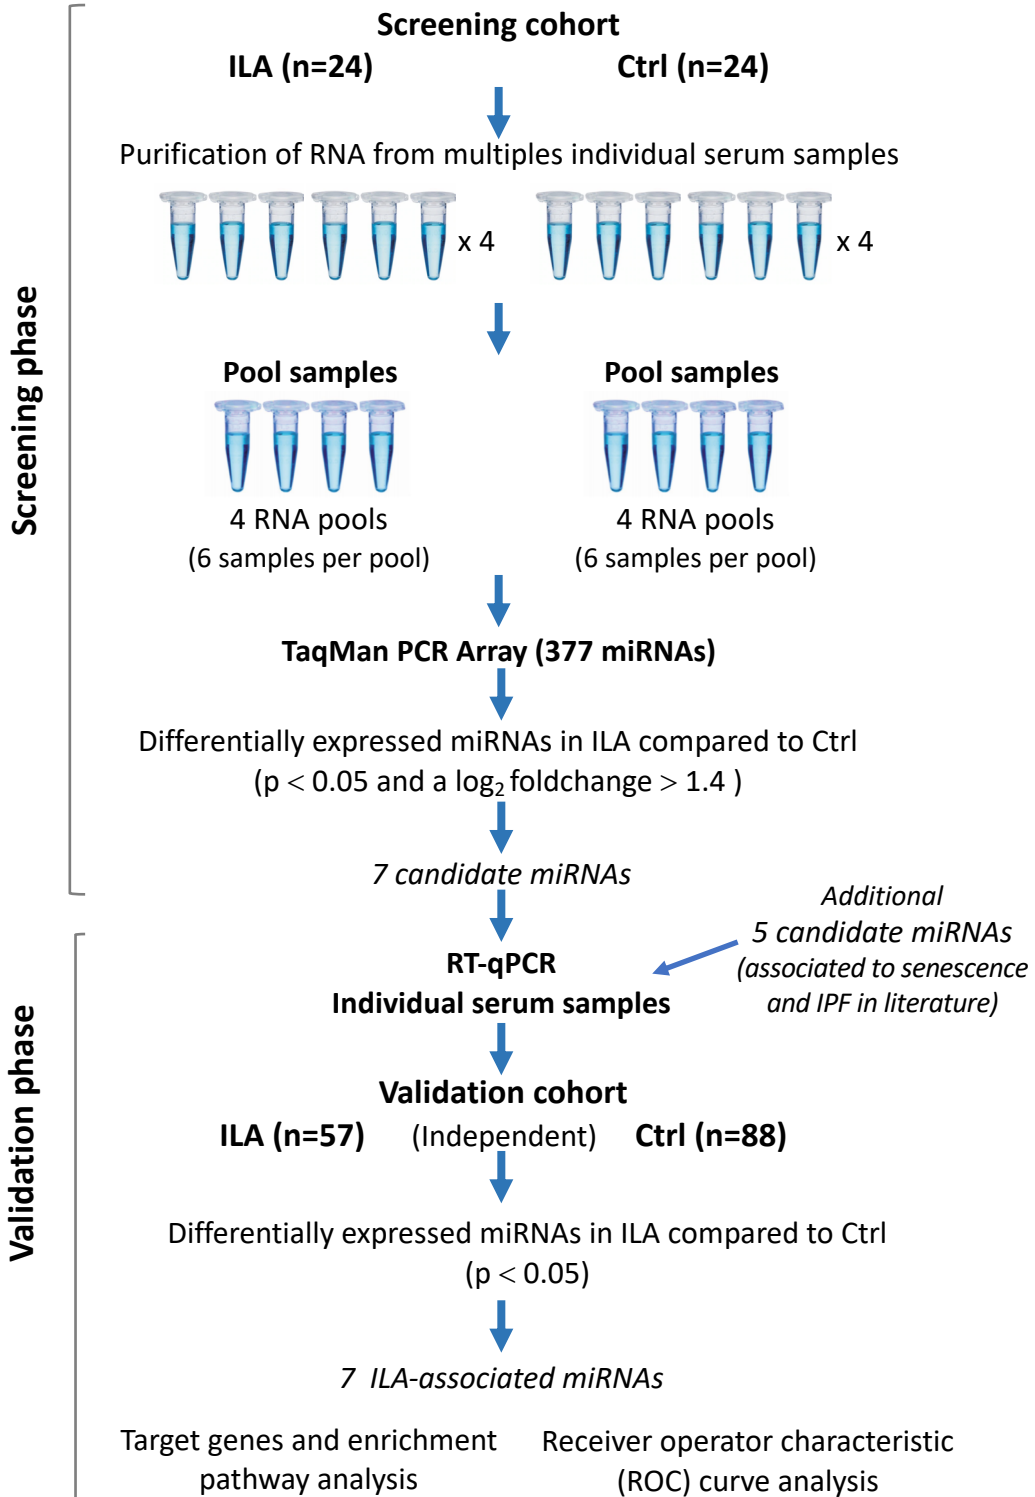

Supplement: s1 [file s1]
